# Supplementary material
Source: PubMed Central journal article supplement (PMC7596850)

**Supplemental Appendix**

## ASPEN Investigators

|                   |                       |                |                              |
|-------------------|-----------------------|----------------|------------------------------|
| Australia         | Constantine Tam       | Netherlands    | Monique Minnema              |
|                   | Gavin Cull            |                | Marie José Kersten           |
|                   | Hui-Peng Lee          | Spain          | Albert Oriol Rocafiguera     |
|                   | Trish Walker          |                | Mario Arnao Herraiz          |
|                   | Paula Marlton         |                | Carlos Fernandez De Larrea   |
|                   | Stephen Opat          |                | Mercedes Gironella Mesa      |
|                   | Hannah Rose           |                | Miquel Granell Gorrochatequi |
|                   | Stephen Mulligan      |                | Elham Askari                 |
|                   | Xavier Badoux         |                | Ramon Garcia Sanz            |
|                   | Dipti Talaulikar      |                | Anna Sureda Balari           |
| France            | Anne-Sophie Michallet |                | Sweden                       |
|                   | Veronique Leblond     | United Kingdom | Roger Owen                   |
| Germany           | Christian Buske       |                | Simon Rule                   |
|                   | Gabriele Kafer        |                | Mark Bishton                 |
| Italy             | Alberto Bosi          |                | Helen McCarthy               |
|                   | Luca Nassi            |                | Shirley D'Sa                 |
|                   | Marina Motta          |                | Jaimal Kothari               |
|                   | Alessandra Tedeschi   |                | Rebecca Auer                 |
|                   | Stefano Volpetti      |                | Czech Republic               |
|                   | Luca Laurenti         | Roman Hajek    |                              |
|                   | Pier Luigi Zinzani    | David Belada   |                              |
|                   | Lorella Orsucci       | Greece         | Meletios Dimopoulos          |
|                   | Marzia Varettoni      | United States  | Luke Dreisbach               |
| Monica Tani       | Edward Libby          |                |                              |
| Michela Ceccolini | Patrick Johnston      |                |                              |
| Poland            | Jaroslawn Czyz        |                | John Allan                   |
|                   | Sebastian Grosicki    |                | Tanya Siddiqi                |
|                   | Wojciech Jurczak      |                | Jeffrey Matous               |
|                   | Janusz Kloczko        | Ian Flinn      |                              |
|                   | Andrzej Pluta         | Jorge Castillo |                              |
|                   |                       | Craig Reeder   |                              |

**Assay methodology for *MYD88* and *CXCR4* mutation analysis**

*MYD88* mutational status was analyzed on baseline bone marrow aspirates without CD-19+ cell selection using a proprietary, PCR-based assay that employs locked oligonucleotides to block amplification of *MYD88* wild-type (WT) DNA during PCR followed by bidirectional Sanger sequencing of the amplicon.<sup>1</sup> This approach captures all mutations from amino acids 260 to 278 in the Toll/IL-1R (TIR) binding domain of *MYD88* with a 0.2%–0.5% limit of detection. Assay for the presence of non-L265P mutations in *MYD88* was performed using a next-generation sequencing method with a 0.5% limit of detection. Three patients (all zanubrutinib-treated and all TN) had 2nd missense mutations detected within the TIR binding domain: M232T, V217F, and P182L. Additional mutations were identified in non-TIR binding domains in 4 patients: D165del (R/R zanubrutinib patient); W91ter, G93ter (R/R ibrutinib patient); L72M (R/R zanubrutinib patient); and T107S, fs24ter (TN, zanubrutinib patient).

Mutations in *CXCR4* were detected using PCR, followed by bidirectional Sanger sequencing of the amplicon in non-CD19+ selected bone marrow aspirates. The lower limit of assay sensitivity allows detection of 10%–15% mutant alleles in a background of wild-type allele, and detects nonsense, frameshift, and other mutations from T318 to S341, which includes almost the full range of *CXCR4*<sup>WHIM</sup> mutations previously reported. The table below summarizes the individual mutations identified (those in **bold** type have been previously described). *CXCR4* mutation analysis was conducted at Neogenomics, Inc., Aliso Viejo, CA, USA.

*CXCR4* mutations were also detected using PredicineCARE™, a next-generation sequencing assay (Predicine, Inc., Hayward CA) targeting a panel of 152 genes including full exonic regions

## Zanubrutinib vs Ibrutinib in WM

Tam et al. – Final draft

of CXCR4. Genomic DNA from bone marrow samples was extracted, enzymatically fragmented and purified. Up to 30ng fragmented DNA were used for library preparation, capture, sequencing and data analysis, as described previously.<sup>2,3</sup> Data were analyzed using a proprietary bioinformatics pipeline (Predicine, Inc, Hayward, CA) and CXCR4 mutations with allelic frequencies  $\geq 0.25\%$  were reported.

1. Albitar A, Ma W, DeDios I, Estella J, Agersborg S, Albitar M. Positive selection and high sensitivity test for MYD88 mutations using locked nucleic acid. *Int J Lab Hematol*. 2016;38(2):133-140
2. Kohli et al. Clinical and Genomic Insights Into Circulating Tumor DNA-based Alterations Across the Spectrum of Metastatic Hormone-Sensitive and Castrate-Resistant Prostate Cancer. *EBioMedicine*. 2020 Apr;54:102728.
3. Fettke et al. Combined Cell-free DNA and RNA Profiling of the Androgen Receptor: Clinical Utility of a Novel Multianalyte Liquid Biopsy Assay for Metastatic Prostate Cance. *Eur Urol*. 2020 May 30;S0302-2838(20)30219-0

Zanubrutinib vs Ibrutinib in WM

Tam et al. – Final draft

The table below summarizes the individual mutations identified either by the Next Generation Sequencing Method, Sanger Sequencing Method or both (those in **bold** type have been previously described):

| Mutation type: | Nucleotide change:      | Amino acid change:          | No. (treatment assignment) of patients with mutation detected by NGS: | No. (treatment assignment) of patients with mutation detected by Sanger Sequencing: |
|----------------|-------------------------|-----------------------------|-----------------------------------------------------------------------|-------------------------------------------------------------------------------------|
| FS             | 952_956del              | <b>Thr318Cysfs</b>          | 2 (zanubrutinib)                                                      | Not Detected                                                                        |
| FS             | 952dup                  | <b>Thr318Asnfs</b>          | 1 (zanubrutinib);<br>2 (ibrutinib)                                    | 1 (ibrutinib)                                                                       |
| FS             | 954del                  | <b>Ser319Leufs</b>          | 1 (zanubrutinib)                                                      | Not Detected                                                                        |
| FS             | 956_957del              | <b>Ser319Cysfs</b>          | 1 (zanubrutinib)                                                      | 1 (zanubrutinib)                                                                    |
| FS             | 963dup                  | <b>Arg322Glnfs</b>          | 1 (zanubrutinib)                                                      | Not Detected                                                                        |
| FS             | 965dup,<br>1012_1015del | Gly323Argfs,<br>Ser338Leufs | 1 (ibrutinib,<br>2 mutations)                                         | Not Detected                                                                        |
| FS             | 976dup                  | <b>Leu326Profs</b>          | 1 (ibrutinib)                                                         | 1 (ibrutinib)                                                                       |
| FS             | 988_989del              | Ser330Glnfs                 | 1 (zanubrutinib)                                                      | 1 (zanubrutinib)                                                                    |
| NS             | 1000C>T                 | <b>Arg334*</b>              | 2 (zanubrutinib)                                                      | 1 (zanubrutinib)                                                                    |
| NS             | 1003_1025del            | Gly335*                     | 1 (zanubrutinib)                                                      | Not Detected                                                                        |
| FS             | 1007_1013del            | <b>Gly336Aspfs</b>          | 1 (zanubrutinib)                                                      | Not Detected                                                                        |
| FS             | 1007dup                 | His337Thrfs                 | 1 (zanubrutinib)                                                      | 1 (zanubrutinib)                                                                    |
| FS             | 1009_1010insCTCCA       | His337Profs                 | 1 (zanubrutinib)                                                      | Not Detected                                                                        |
| FS             | 1010_1011del            | His337Leufs                 | 1 (zanubrutinib)                                                      | Not Detected                                                                        |
| FS             | 1012dup                 | <b>Ser338Phefs</b>          | 2 (zanubrutinib)                                                      | Not Detected                                                                        |
| FS             | 1013_1020del            | <b>Ser338Phefs</b>          | 1 (ibrutinib)                                                         | Not Detected                                                                        |

Zanubrutinib vs Ibrutinib in WM

Tam et al. – Final draft

|          |               |                    |                                     |                                    |
|----------|---------------|--------------------|-------------------------------------|------------------------------------|
| NS       | 1013C>A       | <b>Ser338*</b>     | 9 (5 zanubrutinib;<br>4 ibrutinib)  | 4 (2 zanubrutinib;<br>2 ibrutinib) |
| NS       | 1013C>G       | <b>Ser338*</b>     | 14 (5 zanubrutinib;<br>9 ibrutinib) | 4 (3 zanubrutinib;<br>1 ibrutinib) |
| FS       | 1014_1018del  | <b>Ser339Phefs</b> | 1 (zanubrutinib)                    | Not Detected                       |
| FS       | 1017dup       | Val340Cysfs        | 1 (zanubrutinib)                    | 1 (zanubrutinib)                   |
| FS       | 1018_1022del  | Val340Hisfs        | 1 (zanubrutinib)                    | 1 (zanubrutinib)                   |
| FS       | 1021_1022del  | <b>Ser341Hisfs</b> | 1 (zanubrutinib)                    | Not Detected                       |
| FS       | 1021del       | <b>Ser341Profs</b> | 2 (1 zanubrutinib;<br>1 ibrutinib)  | Not Detected                       |
| FS       | 1021dup       | <b>Ser341Phefs</b> | 2 (1 zanubrutinib;<br>1 ibrutinib)  | 1 (ibrutinib)                      |
| NS       | 1032dup       | <b>Glu345*</b>     | 1 (zanubrutinib)                    | Not Detected                       |
| FS       | 1012_1013insT | <b>S338Ffs</b>     | quality control failure             | 1 (ibrutinib)                      |
| Deletion |               | S338 S352 deletion | Not Detected                        | 1 (ibrutinib)                      |

Abbreviations: FS, frameshift; NS, nonsense; ins, insertion; del deletion; NGS, next generation sequencing.

## Supplemental Tables

**Supplemental Table 1. Zanubrutinib treatment-modification guidelines for toxicity.**

| Toxicity                   | Modification                                                                                                                                                                                                                                                                                                                                                                                                                                                                                                                                                                                                                                                                                                                                                                                                                                                                                                                                                                                                                                                                                                                                                                                                                                                                                                                                                                                                                                                                                                                                                                                                                                                                                                                                                                                                                                                                                                                                                                                                                                                                                                                                                                                                                                                                                                                                                    |
|----------------------------|-----------------------------------------------------------------------------------------------------------------------------------------------------------------------------------------------------------------------------------------------------------------------------------------------------------------------------------------------------------------------------------------------------------------------------------------------------------------------------------------------------------------------------------------------------------------------------------------------------------------------------------------------------------------------------------------------------------------------------------------------------------------------------------------------------------------------------------------------------------------------------------------------------------------------------------------------------------------------------------------------------------------------------------------------------------------------------------------------------------------------------------------------------------------------------------------------------------------------------------------------------------------------------------------------------------------------------------------------------------------------------------------------------------------------------------------------------------------------------------------------------------------------------------------------------------------------------------------------------------------------------------------------------------------------------------------------------------------------------------------------------------------------------------------------------------------------------------------------------------------------------------------------------------------------------------------------------------------------------------------------------------------------------------------------------------------------------------------------------------------------------------------------------------------------------------------------------------------------------------------------------------------------------------------------------------------------------------------------------------------|
| Hematologic toxicities     | <p>Zanubrutinib was interrupted for hematologic toxicity suspected to be study drug-related under any of the following conditions:</p> <ul style="list-style-type: none"> <li>• Grade 4 neutropenia (lasting &gt;10 days despite the use of growth factors) or grade <math>\geq 3</math> febrile neutropenia</li> <li>• Grade 4 thrombocytopenia (lasting &gt;10 days) or grade <math>\geq 3</math> thrombocytopenia associated with significant bleeding</li> </ul> <p>After a first occurrence, zanubrutinib may have been restarted at full dose upon recovery of the toxicity to grade <math>\leq 1</math> or baseline. If the same event recurred, patients restarted at 1 dose level lower (80 g BID) upon recovery of the toxicity to grade <math>\leq 1</math> or baseline. If the event recurred at 80 mg BID, zanubrutinib was once again interrupted until recovery to grade <math>\leq 1</math> or baseline and restarted at 80 mg QD. A maximum of 2 dose reductions was allowed.</p>                                                                                                                                                                                                                                                                                                                                                                                                                                                                                                                                                                                                                                                                                                                                                                                                                                                                                                                                                                                                                                                                                                                                                                                                                                                                                                                                                              |
| Non-hematologic Toxicities | <p>For grade <math>\geq 3</math> non-hematologic toxicities (other than hypertension adequately controlled with oral medication or asymptomatic laboratory events [laboratory events indicating liver or renal dysfunction were not considered asymptomatic laboratory events]) suspected to be study drug-related, zanubrutinib was interrupted until recovery to grade <math>\leq 1</math> or baseline, then restarted at the original dose level.</p> <ul style="list-style-type: none"> <li>• If the event recurred at grade <math>\geq 3</math>, zanubrutinib was interrupted until recovery to grade <math>\leq 1</math> or baseline and restarted at 80 mg BID</li> <li>• If the event recurred at grade <math>\geq 3</math>, zanubrutinib was once again interrupted until recovery to grade <math>\leq 1</math> or baseline and restarted at 80 mg QD. If the event recurred at grade <math>\geq 3</math> at 80 mg QD, zanubrutinib treatment was discontinued. For patients experiencing atrial fibrillation that was symptomatic and/or incompletely controlled, zanubrutinib may have been restarted at either the original dose or 80 mg BID, per the investigator's discretion, after the atrial fibrillation was adequately controlled.</li> <li>• Zanubrutinib was interrupted for any grade <math>3 \geq</math> bleeding</li> <li>• The drug was permanently discontinued for any treatment-related grade <math>\geq 3</math> hemorrhage with the exception of those where the underlying condition could be fully treated (eg, gastric ulcer resulting in gastrointestinal bleed) and the risk of a rebleed was deemed acceptable. For any intracranial hemorrhage, regardless of grade or relationship to the study drug, the study drug was held and the risk of rebleeding was assessed. If the risk of rebleeding was deemed unacceptable, zanubrutinib was permanently discontinued. Zanubrutinib was not resumed unless event resolution was demonstrated by computed tomography (CT) scan or MRI, the risk of rebleeding was deemed low, and the patient did not have a need for concurrent anti-thrombotic medications (except low-dose aspirin or low-molecular-weight heparin used to prevent venous thromboembolism). Study drug resumption only occurred after a discussion and approval by the study medical monitor.</li> </ul> |

**Supplemental Table 2. Reasons for unsuitability for standard immunochemotherapy among treatment-naïve patients enrolled in the ASPEN study.**

| <b>Reason(s)*</b> | <b>Ibrutinib<br/>(n=18)<br/>n (%)</b> | <b>Zanubrutinib<br/>(n=19)<br/>n (%)</b> | <b>Total<br/>(N=37)<br/>n (%)</b> |
|-------------------|---------------------------------------|------------------------------------------|-----------------------------------|
| Age               | 13 (72)                               | 14 (74)                                  | 27 (73)                           |
| Co-morbidity:     |                                       |                                          |                                   |
| Cardiac           | 3 (17)                                | 5 (26)                                   | 8 (22)                            |
| Renal             | 2 (11)                                | 2 (11)                                   | 4 (11)                            |
| Infection         | 1 (6)                                 | 1 (5)                                    | 2 (5)                             |
| Other             | 5 (28)                                | 2 (11)                                   | 7 (19)                            |

\* Patients may have multiple reasons for unsuitability.

**Supplemental Table 3:. Response assessment criteria.\***

| <b>Response category</b>          | <b>Definition</b>                                                                                                                                                                                                                                                                                                                                                                                                                                                                                                                                                                                                                                                                                                          |
|-----------------------------------|----------------------------------------------------------------------------------------------------------------------------------------------------------------------------------------------------------------------------------------------------------------------------------------------------------------------------------------------------------------------------------------------------------------------------------------------------------------------------------------------------------------------------------------------------------------------------------------------------------------------------------------------------------------------------------------------------------------------------|
| Complete response (CR)            | Normal serum IgM values <ul style="list-style-type: none"> <li>• Disappearance of monoclonal protein by immunofixation</li> <li>• No histological evidence of bone marrow involvement</li> <li>• Complete resolution of lymphadenopathy/splenomegaly (if present at baseline)<sup>a,b</sup></li> </ul>                                                                                                                                                                                                                                                                                                                                                                                                                     |
| Very good partial response (VGPR) | Monoclonal IgM protein is detectable <ul style="list-style-type: none"> <li>• <math>\geq 90\%</math> reduction in serum IgM level from baseline<sup>a</sup> or normal serum IgM values</li> <li>• Improvement in lymphadenopathy/splenomegaly if present at baseline<sup>a,b</sup></li> <li>• No new signs or symptoms of active disease</li> </ul>                                                                                                                                                                                                                                                                                                                                                                        |
| Partial response (PR)             | <ul style="list-style-type: none"> <li>• <math>\geq 50\%</math> reduction of serum IgM from baseline</li> <li>• Reduction in lymphadenopathy/splenomegaly (if present at baseline)<sup>a,b</sup></li> </ul>                                                                                                                                                                                                                                                                                                                                                                                                                                                                                                                |
| Minor response (MR)               | At least 25% but $< 50\%$ reduction of serum IgM from baseline                                                                                                                                                                                                                                                                                                                                                                                                                                                                                                                                                                                                                                                             |
| Stable disease (SD)               | Not meeting criteria for CR, VGPR, PR, MR, or progressive disease                                                                                                                                                                                                                                                                                                                                                                                                                                                                                                                                                                                                                                                          |
| Progressive disease (PD)          | At least one of the following: <ul style="list-style-type: none"> <li>• Confirmed, <math>\geq 25\%</math> increase in serum IgM and total on-treatment increase of <math>\geq 500</math> mg/dL from nadir<sup>c</sup></li> <li>• New lymph node(s) <math>&gt; 1.5</math> cm, or <math>\geq 50\%</math> increase from nadir in the sum of the product of diameter (SPD) of <math>&gt; 1</math> node, or <math>\geq 50\%</math> increase in longest diameter of a previously identified node</li> <li>• New splenomegaly or <math>\geq 50\%</math> increase from nadir in enlargement</li> <li>• New extranodal disease</li> <li>• New or recurrent involvement in bone marrow</li> <li>• New symptomatic disease</li> </ul> |

\*Adapted from criteria established at the Sixth International Workshop on Waldenström's Macroglobulinemia as reported by Owen et al 2013.<sup>23</sup> Sequential changes in IgM levels (separated by at least 4 weeks) assessed nephelometrically were employed for the quantitative serum immunoglobulin level measurements, unless due to assay limitations, this was not possible, in which case the M-paraprotein level by serum protein electrophoresis was used.

<sup>a</sup> For response assessments that occur in cycles that do not require imaging studies, results from prior scans performed up to 12 weeks during the first 48 weeks of study and up to 24 weeks thereafter can be carried forward in subjects with extramedullary disease at baseline.

<sup>b</sup> If only physical examination (PE) findings of extramedullary disease are assessable and indicative of unequivocal improvement from baseline (enlarged spleen and/or palpable lymph nodes have regressed), reduction in extramedullary disease can be assessed by PE alone.

<sup>c</sup> An assessment of IgM flare will be assigned instead of PD after study drug has been held at least 7 consecutive days and there is a rapid rise in serum IgM level (or an increase in known extramedullary disease for response assessments that include extramedullary disease evaluation) that might otherwise lead to an "apparent" response of PD. The period that this is applicable begins on the day of the first missed dose and ends when the patient has IgM levels or extramedullary disease that no longer qualify as apparent PD (eg, there is a drop in IgM level below 25% and  $< 500$  mg/dL from nadir) or the subject has a confirmed response of PD, whichever comes first.



**Supplemental Table 4. Adverse events of interest categories**

Adverse events of interest were identified in accordance with predefined MedDRA (Version 22.0) search criteria (see below) and categorized into the following categories of BTK-associated toxicities:

| Adverse event of interest category                                                                                            | Search criteria                                                                                                                                                                                                                                                                                                             |
|-------------------------------------------------------------------------------------------------------------------------------|-----------------------------------------------------------------------------------------------------------------------------------------------------------------------------------------------------------------------------------------------------------------------------------------------------------------------------|
| Hemorrhage                                                                                                                    | Hemorrhage terms (excluding laboratory terms) (SMQ) narrow                                                                                                                                                                                                                                                                  |
| Major hemorrhage - Defined as serious or grade $\geq 3$ bleeding at any site, or central nervous system bleeding of any grade | Major hemorrhage: <ul style="list-style-type: none"> <li>• Subdural hematoma PT, subdural hemorrhage PT</li> <li>• All hemorrhage PTs if adverse event SOC is “Nervous system disorders” or</li> <li>• Serious or <math>\geq</math> grade 3 hemorrhage PT if adverse event SOC is not “Nervous system disorders”</li> </ul> |
| Atrial fibrillation and/or flutter                                                                                            | Atrial fibrillation PT, atrial flutter PT                                                                                                                                                                                                                                                                                   |
| Hypertension                                                                                                                  | Hypertension (SMQ) narrow                                                                                                                                                                                                                                                                                                   |
| Second primary malignancies<br>Skin cancers                                                                                   | Malignant tumors (SMQ) narrow<br>Subcategory - skin malignant tumors (SMQ) narrow                                                                                                                                                                                                                                           |
| Tumor lysis syndrome                                                                                                          | Tumor lysis syndrome (SMQ) narrow                                                                                                                                                                                                                                                                                           |
| Infection<br>Opportunistic infections                                                                                         | Infections: infections and infestations SOC<br>Subcategory - opportunistic infections: opportunistic infections (CMQ)                                                                                                                                                                                                       |
| Neutropenia                                                                                                                   | Neutropenia PT, neutrophil count decreased PT, febrile neutropenia PT, agranulocytosis PT, neutropenic infection PT, neutropenic sepsis PT                                                                                                                                                                                  |
| Thrombocytopenia                                                                                                              | Thrombocytopenia PT, platelet count decreased PT                                                                                                                                                                                                                                                                            |
| Anemia                                                                                                                        | Anemia PT, hemoglobin decreased PT                                                                                                                                                                                                                                                                                          |

Abbreviations: PT, preferred term; SMQ, standard MedDRA query; CMQ, company MedDRA query.

**Supplemental Table 5. Reasons for initiation of study therapy**

|                                                              | Relapsed/Refractory |                        | Treatment-naive     |                        | Overall             |                         | Total<br>(N=201) |
|--------------------------------------------------------------|---------------------|------------------------|---------------------|------------------------|---------------------|-------------------------|------------------|
|                                                              | Ibrutinib<br>(n=81) | Zanubrutinib<br>(n=83) | Ibrutinib<br>(n= 8) | Zanubrutinib<br>(n=19) | Ibrutinib<br>(n=99) | Zanubrutinib<br>(n=102) |                  |
| <b>Clinical indications, n (%)</b>                           |                     |                        |                     |                        |                     |                         |                  |
| Fatigue                                                      | 47 (58)             | 44 (53)                | 10 (56)             | 14 (74)                | 57 (58)             | 58 (57)                 | 115 (57)         |
| B-symptoms <sup>a</sup>                                      | 22 (27)             | 29 (35)                | 4 (22)              | 6 (32)                 | 26 (26)             | 35 (34)                 | 61 (30)          |
| Hyperviscosity                                               | 19 (24)             | 20 (24)                | 8 (44)              | 7 (32)                 | 27 (27)             | 27 (27)                 | 54 (27)          |
| Peripheral neuropathy due to WM                              | 17 (21)             | 18 (22)                | 4 (22)              | 6 (32)                 | 21 (21)             | 24 (24)                 | 45 (22)          |
| Symptomatic or bulky lymphadenopathy <sup>b</sup>            | 7 (9)               | 10 (12)                | 1 (6)               | 0                      | 8 (8)               | 10 (10)                 | 18 (9)           |
| Symptomatic hepatomegaly and/or splenomegaly                 | 4 (5)               | 2 (2)                  | 2 (11)              | 0                      | 6 (6)               | 2 (2)                   | 8 (4)            |
| Symptomatic organomegaly and/or organ or tissue infiltration | 2 (3)               | 0                      | 0                   | 0                      | 2 (2)               | 0                       | 2 (1)            |
| <b>Laboratory indications, n (%)</b>                         |                     |                        |                     |                        |                     |                         |                  |
| Hemoglobin ≤10 g/dL                                          | 30 (37)             | 36 (43)                | 10 (56)             | 12 (63)                | 40 (40)             | 48 (47)                 | 88 (44)          |
| Platelet count <100 x 10 <sup>9</sup> /L                     | 12 (15)             | 11 (13)                | 0                   | 1 (5)                  | 12 (12)             | 12 (12)                 | 24 (12)          |
| Amyloidosis related to WM                                    | 6 (7)               | 9 (11)                 | 3 (17)              | 3 (16)                 | 9 (9)               | 12 (12)                 | 21 (10)          |
| Immune hemolytic anemia and/or thrombocytopenia              | 2 (3)               | 2 (2)                  | 0                   | 1 (5)                  | 2 (2)               | 3 (3)                   | 5 (3)            |
| Symptomatic cryoglobulinemia                                 | 1 (1)               | 1 (1)                  | 0                   | 1 (5)                  | 1 (1)               | 2 (2)                   | 3 (2)            |
| Neuropathy related to WM                                     | 2 (3)               | 0                      | 1 (6)               | 1 (5)                  | 3 (3)               | 1 (1)                   | 4 (2)            |
| Cold agglutinin anemia                                       | 0                   | 0                      | 0                   | 1 (5)                  | 0                   | 1 (1)                   | 1 (1)            |

<sup>a</sup> Includes recurrent fever, night sweats, and weight loss.

<sup>b</sup> Bulky is defined as ≥5 cm in maximal diameter.

**Supplemental Table 6. Summary of prior systemic therapies for relapsed/refractory WM patients**

| Prior therapy, n (%)                                                                                            | Ibrutinib<br>(n=81) | Zanubrutinib<br>(n=83) |
|-----------------------------------------------------------------------------------------------------------------|---------------------|------------------------|
| Number of prior systemic regimens                                                                               |                     |                        |
| 1                                                                                                               | 46 (57)             | 47 (57)                |
| 2                                                                                                               | 15 (19)             | 15 (18)                |
| 3                                                                                                               | 13 (16)             | 14 (17)                |
| 4                                                                                                               | 2 (2)               | 4 (5)                  |
| 5                                                                                                               | 3 (4)               | 0                      |
| ≥6                                                                                                              | 2 (3)               | 3 (4)                  |
|                                                                                                                 |                     |                        |
| Anti-CD20 (rituximab, ofatumumab)                                                                               | 74 (91)             | 75 (90)                |
| Alkylating agents (cyclophosphamide, chlorambucil, bendamustine, ifosamide, lomustine, melphalan, cisplatin)    | 66 (82)             | 73 (88)                |
| Glucocorticoids (dexamethasone, prednisone, prednisolone, methylprednisone, methylprednisolone, hydrocortisone) | 50 (62)             | 60 (72)                |
| Nucleoside analogues (fludarabine, cladribine, cytarabine, gemcitabine,)                                        | 18 (22)             | 20 (24)                |
| Vinca alkaloids (vincristine, vinblastine, vinorelbine)                                                         | 18 (22)             | 23 (28)                |
| Proteasome inhibitors (bortezomib, ixazomib)                                                                    | 10 (12)             | 10 (12)                |
| Anthracyclines (doxorubicin, epirubicin)                                                                        | 9 (11)              | 9 (11)                 |
| Kinase inhibitors (idelalisib, everolimus)                                                                      | 3 (4)               | 2 (2)                  |
| Immunomodulators (lenalidomide, thalidomide)                                                                    | 1 (1)               | 1 (1)                  |
| Topoisomerase inhibitors (etoposide)                                                                            | 1 (1)               | 2 (2)                  |
| Multi-agent regimens, including anti-CD20                                                                       | 0                   | 1 (1)                  |
| Others (interferon, bleomycin, belimumab, methotrexate)                                                         | 0                   | 4 (5)                  |

Abbreviations: BTK, Bruton tyrosine kinase; R/R, relapsed/refractory; WM, Waldenström macroglobulinemia.

\* Categories of systemic therapies listed are not mutually exclusive (patients may have received agents from multiple different categories). Percentages may total more or less than 100 due to rounding.

**Supplemental Table 7. Changes from baseline in log-transformed IgM levels for relapsed/refractory WM patients and overall**

| Parameter                             | Relapsed/Refractory |                        | Overall             |                         |
|---------------------------------------|---------------------|------------------------|---------------------|-------------------------|
|                                       | Ibrutinib<br>(n=81) | Zanubrutinib<br>(n=83) | Ibrutinib<br>(n=99) | Zanubrutinib<br>(n=101) |
| Slope over time (in months)           | -0.06687            | -0.07493               | -0.06106            | -0.06812                |
| <i>P</i> value (2-sided) <sup>a</sup> | 0.0358              |                        | 0.0314              |                         |
| AUC                                   |                     |                        |                     |                         |
| Top 25% percentile                    | 851                 | 1086                   | 849                 | 1030                    |
| Median                                | 528                 | 623                    | 551                 | 621                     |
| <i>P</i> value (2-sided) <sup>b</sup> | 0.0243              |                        | 0.0370              |                         |

<sup>a</sup> From repeated measures, mixed effect model with time as continuous variable and treatment arm and time as fixed effects.

*P* value is for the interaction between treatment arm and time effects.

<sup>b</sup> From Mantel-Haenszel test.

Abbreviation: AUC, area under the log<sub>10</sub> serum IgM concentration x time curve.

**Supplemental Table 8. Serious AEs reported in >1 patient in either treatment arm and deaths due to adverse events**

| Event term, n (%)                 | Ibrutinib<br>(n=98) | Zanubrutinib<br>(n=101) |
|-----------------------------------|---------------------|-------------------------|
| Pneumonia                         | 9 (9)               | 1 (1)                   |
| Sepsis                            | 3 (3)               | 2 (2)                   |
| Pyrexia                           | 3 (3)               | 2 (2)                   |
| Atrial fibrillation/flutter       | 3 (3)               | 0 (0)                   |
| Cholecystitis                     | 2 (2)               | 0 (0)                   |
| Loss of consciousness             | 2 (2)               | 0 (0)                   |
| Myocardial infarction             | 2 (2)               | 0 (0)                   |
| Pericarditis                      | 2 (2)               | 0 (0)                   |
| Urinary tract infection           | 2 (2)               | 0 (0)                   |
| Influenza                         | 1 (1)               | 3 (3)                   |
| Pleural effusion                  | 1 (1)               | 2 (2)                   |
| Neutropenia                       | 0 (0)               | 3 (3)                   |
| Febrile neutropenia               | 0 (0)               | 3 (3)                   |
| Anemia                            | 0 (0)               | 2 (2)                   |
| Lower respiratory tract infection | 0 (0)               | 2 (2)                   |
| Thrombocytopenia                  | 0 (0)               | 2 (2)                   |
| Basal cell carcinoma              | 0 (0)               | 2 (2)                   |

**Deaths due to adverse events**

| Diagnosis<br>sex/age (y) | Study<br>treatment | MedDRA-<br>preferred term<br>(verbatim AE<br>term) | Date of death<br><30 days of<br>last dose | Comments                                                                                                                                                                                                               |
|--------------------------|--------------------|----------------------------------------------------|-------------------------------------------|------------------------------------------------------------------------------------------------------------------------------------------------------------------------------------------------------------------------|
| R/R WM<br>M/85           | Ibrutinib          | Bacterial sepsis<br>(Gram negative<br>septicemia)  | Yes                                       | Death preceded by pneumonia, septic shock; history of hypertension, myocardial ischemia, atrial fibrillation                                                                                                           |
| R/R WM<br>M/84           | Zanubrutinib       | Cardiomegaly<br>(Cardiomegaly)                     | Yes                                       | History of hypertension, valvular and ischemic heart disease. Patient collapsed and died from complications of sudden cardiac arrest after an elective plasmapheresis performed in the setting of progressive disease. |
| R/R WM<br>F/79           | Ibrutinib          | Sepsis<br>(Sepsis)                                 | Yes                                       | Death preceded by pneumonia, urinary tract infection; history of hypertension, cardiac murmur.                                                                                                                         |

**Supplemental Table 9. Post-hoc Analysis of CR/VGPR and Major Response Rates Based on Next Generation Sequencing for Detection of *CXCR4*<sup>WHIM</sup> Mutations <sup>a</sup>**

| Patients with NGS results for <i>CXCR4</i> mutation detection <sup>b</sup> | Ibrutinib<br>N=92 | Zanubrutinib<br>N= 98 |
|----------------------------------------------------------------------------|-------------------|-----------------------|
| <i>CXCR4</i> <sup>WHIM</sup> , n (%)                                       | 20 (22)           | 33 (34)               |
| VGPR, n (%)                                                                | <b>2 (10)</b>     | <b>6 (18)</b>         |
| Median time to VGPR, months                                                | 10.6              | 10.3                  |
| Major response, n (%)                                                      | 13 (65)           | 23 (70)               |
| Median time to major response, months                                      | 6.5               | 3.0                   |
| <i>CXCR4</i> <sup>WT</sup> , n (%)                                         | 72 (78)           | 65 (66)               |
| VGPR, n (%)                                                                | <b>17 (24)</b>    | <b>22 (34)</b>        |
| Median Time to VGPR, months                                                | 7.4               | 4.7                   |
| Major response, n (%)                                                      | 59 (82)           | 53 (82)               |
| Median time to major response, months                                      | 2.8               | 2.8                   |
| <b>Overall</b>                                                             |                   |                       |
| VGPR, n (%)                                                                | <b>19 (21)</b>    | <b>28 (29)</b>        |
| Major response, n (%)                                                      | 72 (78)           | 76 (78)               |

<sup>a</sup> Denominators represent the number of patients with *CXCR4* NGS results in each treatment arm/subgroup.

<sup>b</sup> Seven ibrutinib- and 4 zanubrutinib-treated patients did not undergo re-assay for *CXCR4* mutation detection by NGS. Of these, 6 ibrutinib patients achieved a best response of PR and 2 zanubrutinib patients achieved a best response of VGPR and PR.

Abbreviations: VGPR, very good partial response; NGS, next generation sequencing; *CXCR4*, chemokine receptor 4

Supplemental Figures

Supplemental Figure 1. Changes in (A) IgM and (B) hemoglobin concentrations

(A) Changes in serum IgM levels over time by treatment arm

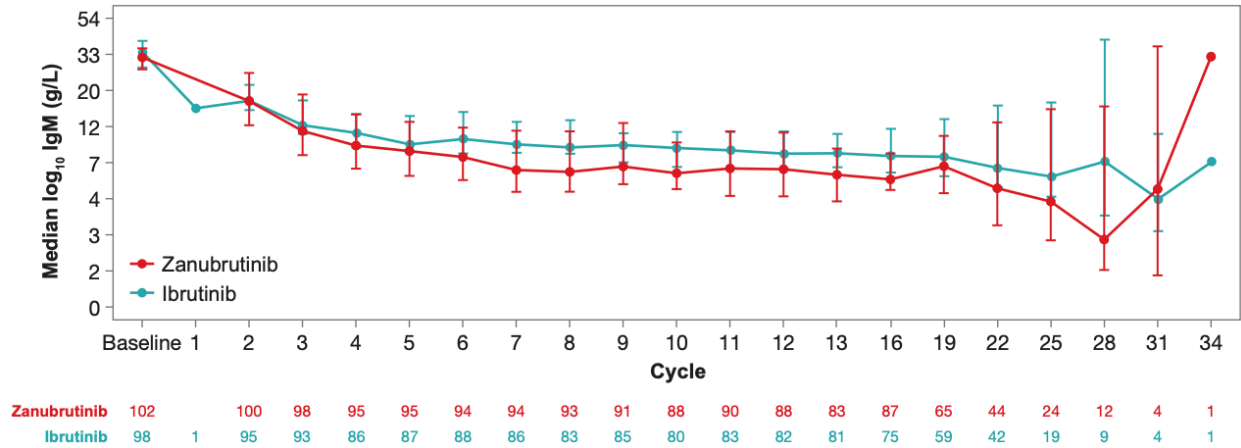

(B) Changes in hemoglobin concentrations over time by treatment arm

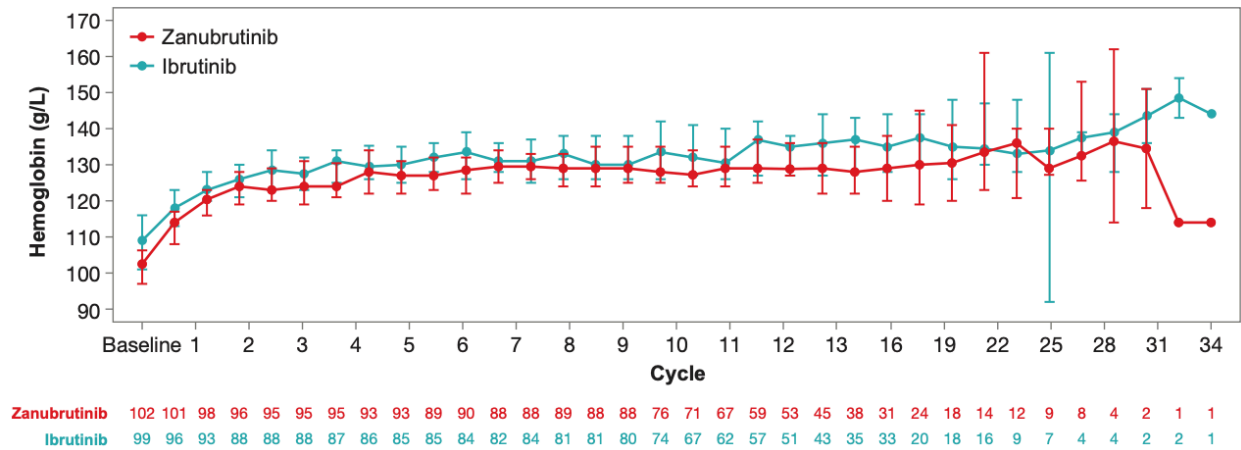

**Supplemental Figure 2. Quality-of-life measures over time**

**A) EQ-5D**

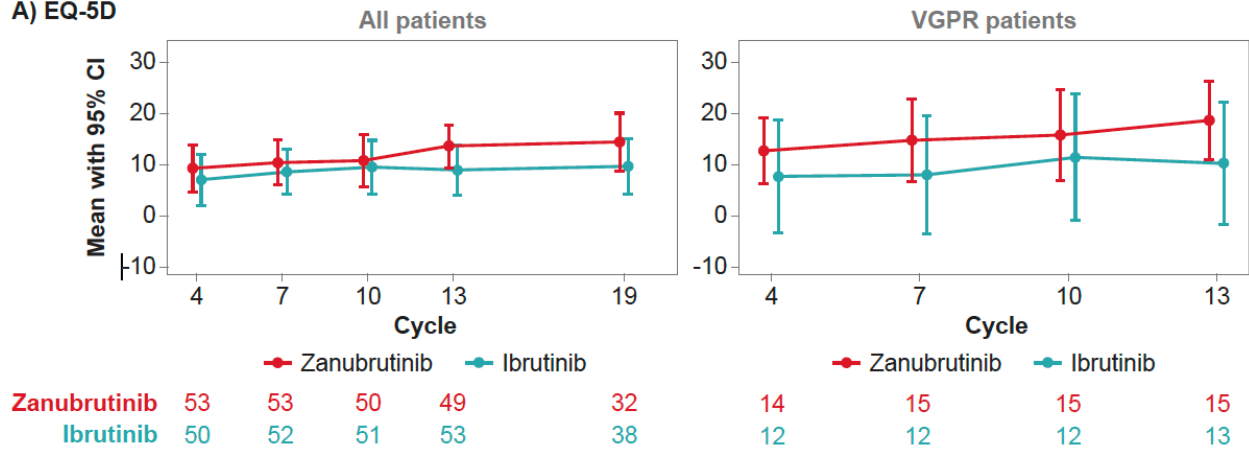

**B) QLQ-C30**

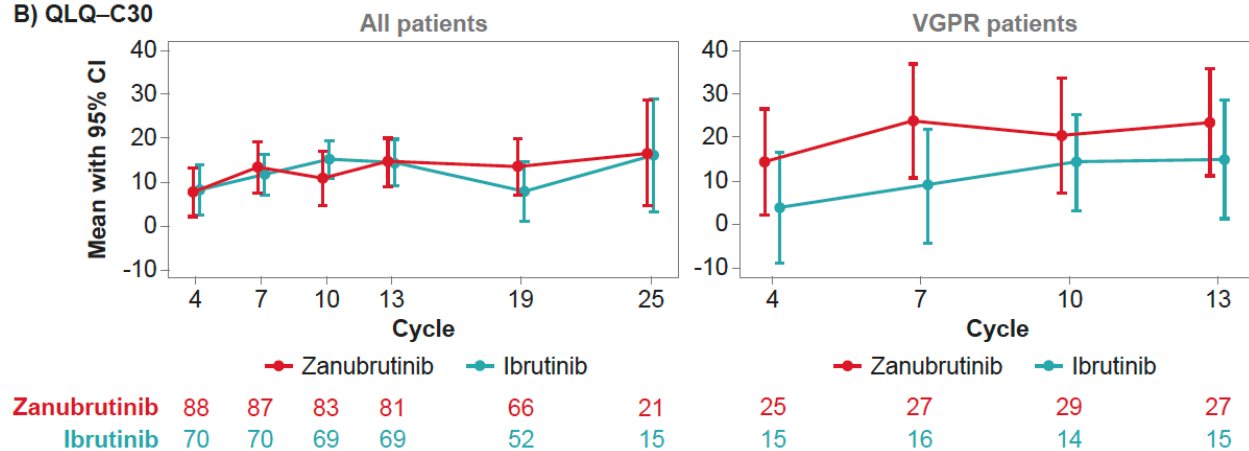

**C) Loss of appetite**

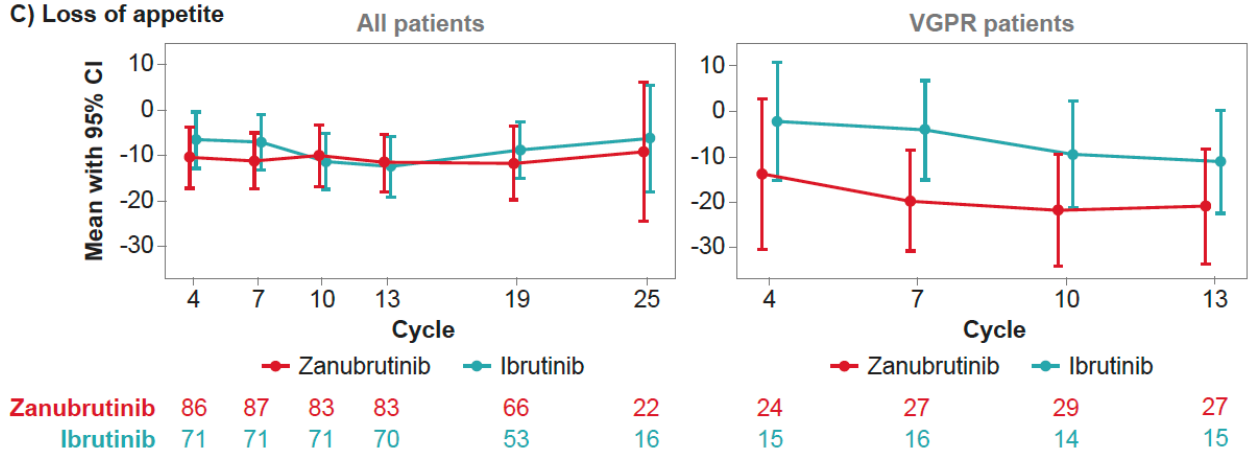



Zanubrutinib vs Ibrutinib in WM

Tam et al. – Final draft

D) Cognitive functioning

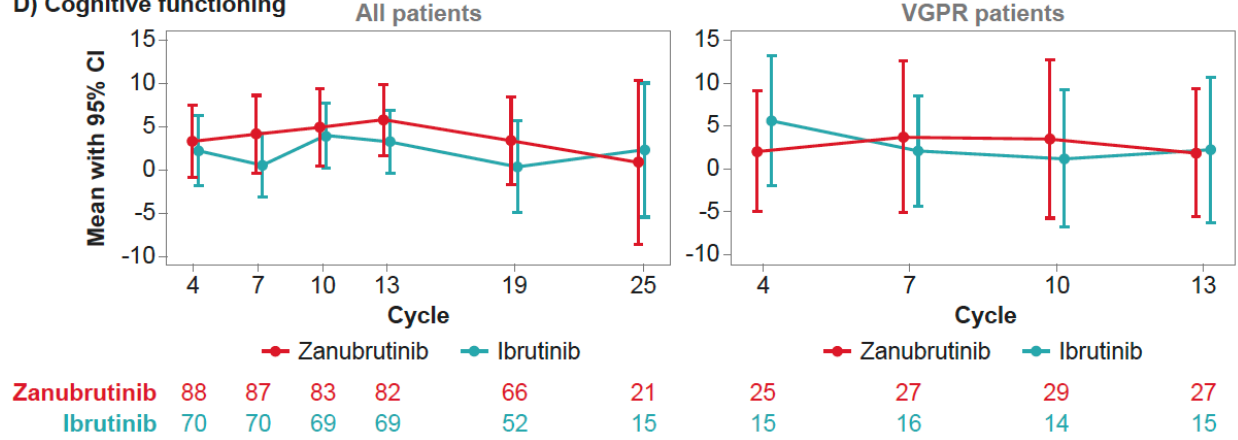

E) Emotional functioning

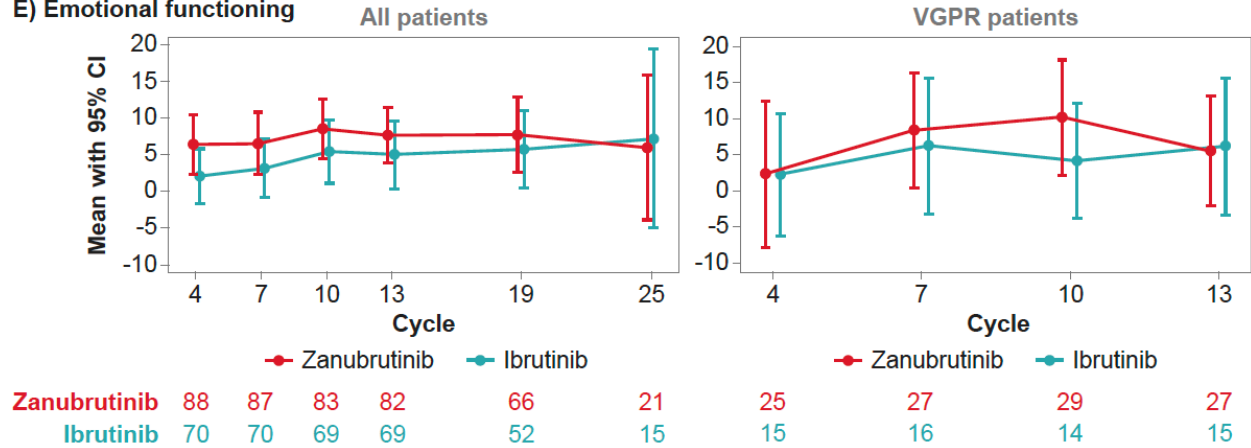

F) Fatigue

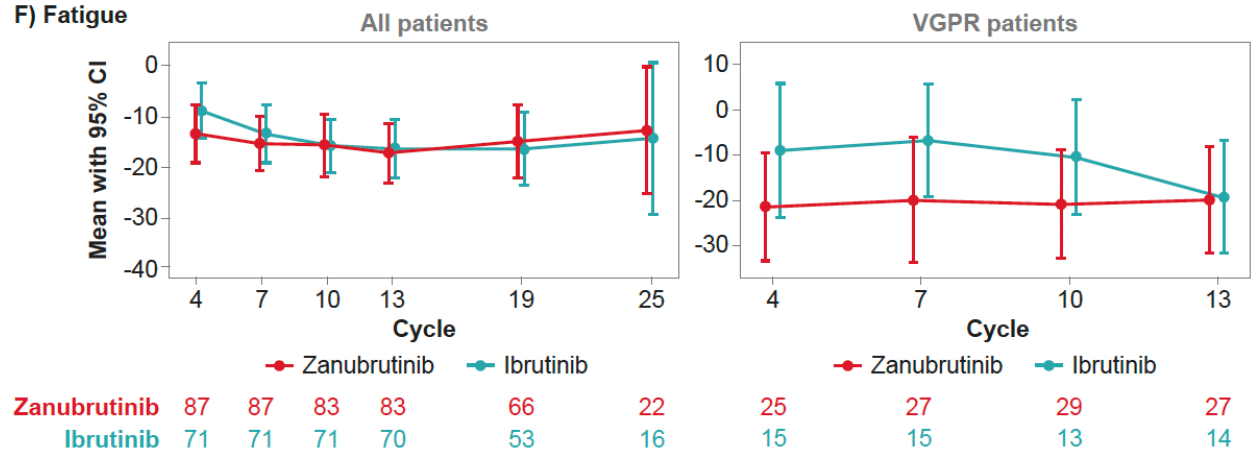

Zanubrutinib vs Ibrutinib in WM

Tam et al. – Final draft

G) Insomnia

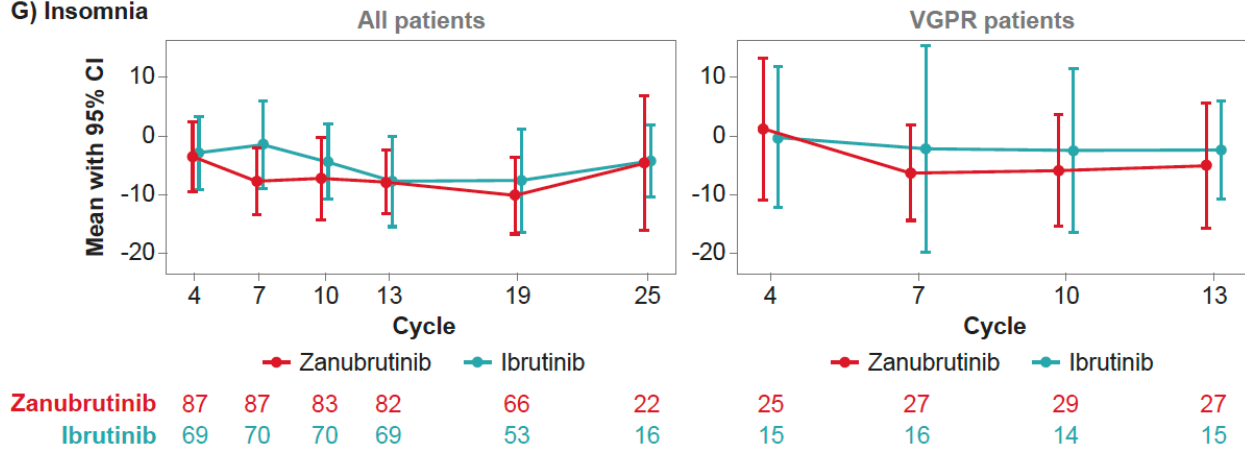

H) Physical functioning

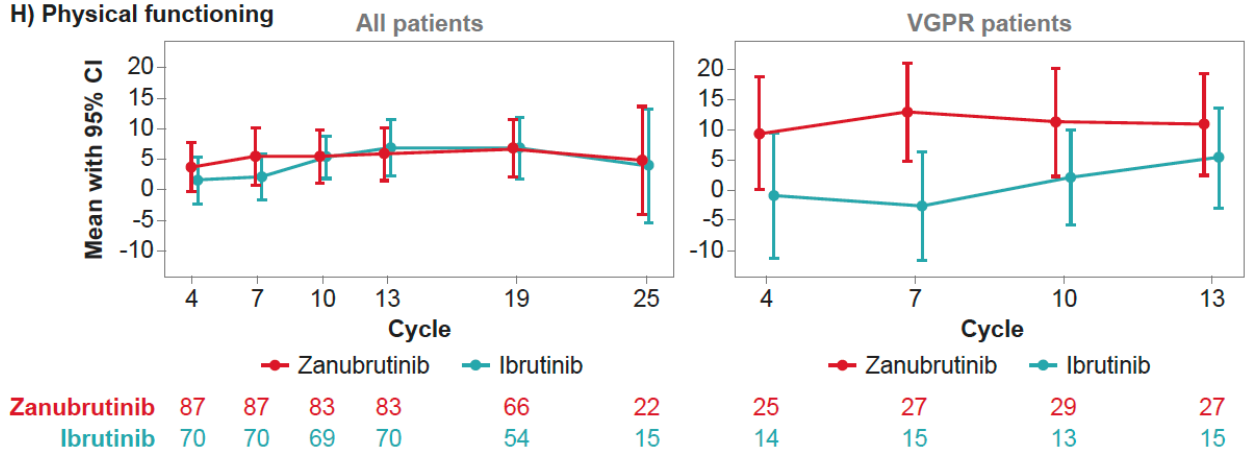

I) Role functioning

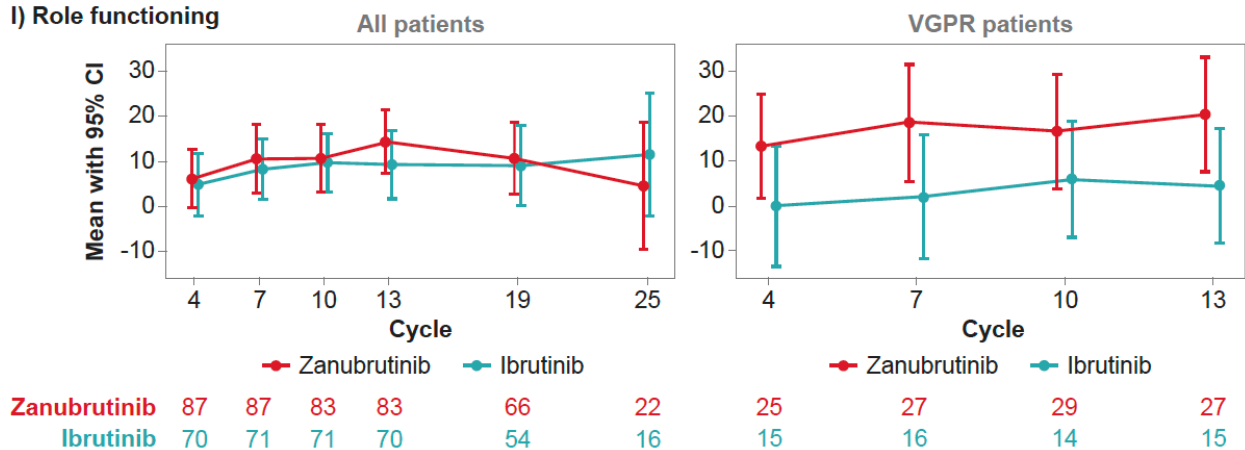

Zanubrutinib vs Ibrutinib in WM

Tam et al. – Final draft

J) Diarrhea

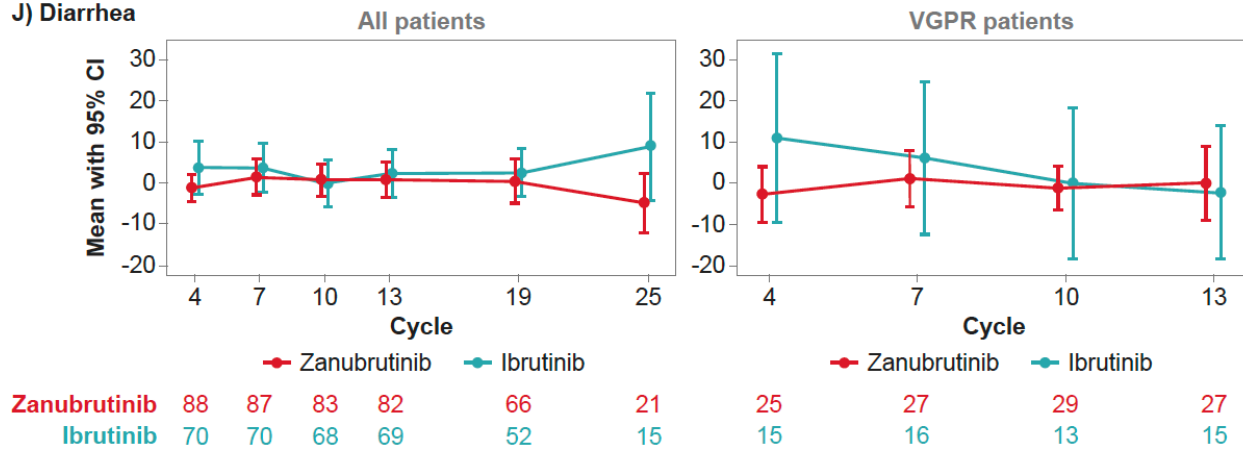

K) Dyspnea

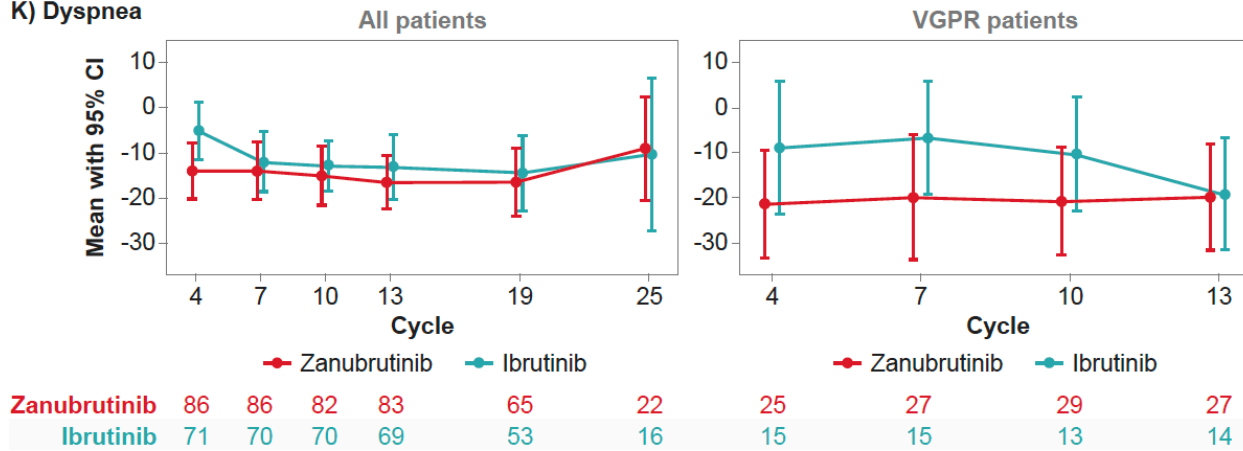

Supplement: bloodBLD2020006844-suppl1.pdf [file bloodBLD2020006844-suppl1.pdf]
